# Supplementary material for: Eye and head movements shape gaze shifts in Indian peafowl
Source: Oxford University Press journal article supplement (doi:10.1242/jeb.129544), 2015-01-01
Supplement: jeb129544supp.pdf [file jeb129544supp.pdf]

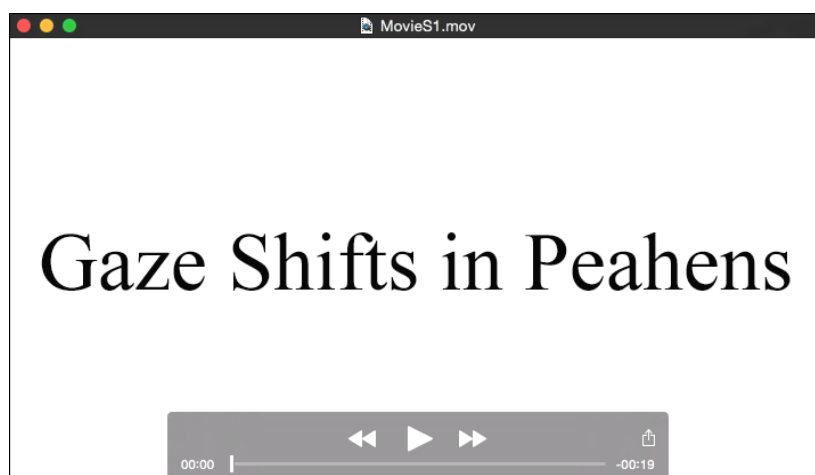

**Movie 1.** Peahens shift their gaze while freely moving in their environment. The first clip shows a peahen making a small gaze shift. The total gaze shift is  $20^\circ$ , with the head movement contributing  $18^\circ$  and the eye movement contributing only  $2^\circ$ . The second clip shows a peahen making a large gaze shift. The total gaze shift is  $60^\circ$ , with the head movement contributing  $33^\circ$  and the eye movement contributing  $27^\circ$ . The yellow dot indicates where the bird is looking within the environment and the eye movement is displayed in the upper right corner.
